# Supplementary material for: Effects of long-term culture on the biological characteristics and RNA profiles of human bone-marrow-derived mesenchymal stem cells
Source: PubMed Central journal article supplement — Mol Ther Nucleic Acids. 2021 Aug 19;26:557–74. doi: 10.1016/j.omtn.2021.08.013 (PMC8479280; doi:10.1016/j.omtn.2021.08.013), 2021-08-19
Supplement: mmc1.pdf [file mmc1.pdf]

**Supplemental information**

**Effects of long-term culture on the biological characteristics and RNA profiles of human bone-marrow-derived mesenchymal stem cells**

**Shan Wang, Ziming Wang, Hongjun Su, Finglei Chen, Mengjun Ma, Wenhui Yu, Guiwen Ye, Shuizhong Cen, Rujia Mi, Xiaohua Wu, Wen Deng, Pei Feng, Chenying Zeng, Huiyong Shen, and Yanfeng Wu**

**Table S1. Quantitative Profiles of the Cell Cycle Study of MSCs at P4, P6, P8, P10 and P12  
(n=9, means  $\pm$  SD)**

| Percent of Cells in the Cell Cycle | P4               | P6               | P8               | P10              | P12              |
|------------------------------------|------------------|------------------|------------------|------------------|------------------|
| Percent of G1 cells                | 61.42 $\pm$ 7.33 | 61.76 $\pm$ 7.17 | 66.88 $\pm$ 9.07 | 65.53 $\pm$ 5.00 | 59.56 $\pm$ 9.74 |
| Percent of S+G2/M cells            | 26.72 $\pm$ 3.54 | 19.39 $\pm$ 1.82 | 14.16 $\pm$ 2.51 | 10.86 $\pm$ 2.19 | 7.51 $\pm$ 1.58  |
| Percent of S cells                 | 20.9 $\pm$ 2.52  | 15.54 $\pm$ 1.82 | 12.08 $\pm$ 3.05 | 9.28 $\pm$ 2.29  | 6.68 $\pm$ 1.78  |
| Percent of G2/M cells              | 5.82 $\pm$ 2.32  | 3.85 $\pm$ 1.60  | 2.35 $\pm$ 0.73  | 1.58 $\pm$ 0.62  | 0.84 $\pm$ 0.46  |

**Table S2. Top 10 Terms with the Largest Significant Differences in the GO Biological Process****Analysis of DE mRNAs Related to Proliferation**

| Term                                                          | Count | Rich Ratio | <i>p</i> Value | Gene                                                                                                                             |
|---------------------------------------------------------------|-------|------------|----------------|----------------------------------------------------------------------------------------------------------------------------------|
| Positive regulation of cell proliferation                     | 21    | 0.029577   | 3.90E-10       | LEP, GREM1, S1PR1, LIF, EPGN, TNC, SOX4, S1PR3, FGF2, CCND1, THBS1, ADM, EDN1, PTN, STAT1, DMD, CXCL12, RUNX2, GPNMB, IGF2, GRK5 |
| Positive regulation of apoptotic process                      | 16    | 0.034858   | 3.68E-16       | CLU, FGD4, FANK1, ARHGEF3, SOX4, MMP9, ANKRD1, EVI2A, ADM, PTN, BNIP3, NGF, PYCARD, PNMA2, LDHA, SFRP4                           |
| Heart development                                             | 10    | 0.031949   | 5.60E-10       | SOX4, CRIP1, GLI3, EVI2A, ADM, EDN1, PTN, ZFP36L1, DVL2, HEG1                                                                    |
| Response to hypoxia                                           | 9     | 0.038961   | 7.83E-10       | LEP, EVI2A, CAV1, THBS1, ADM, EDN1, CXCL12, BNIP3, LDHA                                                                          |
| Cellular response to transforming growth factor beta stimulus | 6     | 0.075      | 1.29E-08       | TINAGL1, ANKRD1, CAV1, CLEC3B, EDN1, ZFP36L1                                                                                     |
| Telomere organization                                         | 4     | 0.285714   | 1.42E-08       | HIST1H4A, HIST1H3I, HIST1H3H, HIST1H3A                                                                                           |
| Vasculogenesis                                                | 6     | 0.073171   | 1.50E-08       | TEAD2, CAV1, ADM, ZFP36L1, EPHA2, HEG1                                                                                           |
| Negative regulation of apoptotic process                      | 12    | 0.015287   | 3.55E-08       | LEP, FANK1, EPHB2, MMP9, GLI3, EVI2A, THBS1, COMP, BNIP3, NGF, SH3D21, EPHA2                                                     |
| Negative regulation of cell death                             | 6     | 0.063158   | 3.66E-08       | CLU, TEAD2, SOX4, FGF2, BNIP3, WISP2                                                                                             |
| DNA replication-dependent nucleosome assembly                 | 4     | 0.181818   | 1.03E-07       | HIST1H4A, HIST1H3I, HIST1H3H, HIST1H3A                                                                                           |
| Chromatin silencing at rDNA                                   | 4     | 0.166667   | 1.49E-07       | HIST1H4A, HIST1H3I, HIST1H3H, HIST1H3A                                                                                           |

**Table S3. Top 10 Terms with the Largest Significant Differences in the GO Biological Process****Analysis of DE mRNAs Related to Differentiation**

| Term                                       | Count | Rich Ratio | <i>p</i> Value | Gene                                                                                                                                                                                                                                 |
|--------------------------------------------|-------|------------|----------------|--------------------------------------------------------------------------------------------------------------------------------------------------------------------------------------------------------------------------------------|
| Ossification                               | 15    | 0.12605    | 1.63E-16       | TMEM119, LRRC17, IFITM1, MMP9, STC1, ACP5, MMP16, TWIST1, CLEC3B, PTN, COMP, RUNX2, KAZALD1, MGP, IGF2                                                                                                                               |
| Angiogenesis                               | 21    | 0.058496   | 8.62E-16       | LEP, NDNF, GREM1, ANGPTL4, S1PR1, NRP2, SLC38A1, EPGN, CXCL8, EPHB2, EGFL7, ADGRA2, SERPINE1, JAG1, TGFBI, FZD8, CAV1, CCBE1, NRCAM, EPHA2, COL4A1                                                                                   |
| Cell differentiation                       | 32    | 0.027515   | 3.14E-14       | TMEM119, NOTCH3, HERC4, ANGPTL4, SH3PXD2B, GLIS2, EPHB2, EGFL7, SOX4, OSR1, TWIST1, CAV1, NR1H3, CAV2, DMD, BEX1, SERPINE2, TENM4, RUNX2, EFNA5, ZNF521, KAZALD1, MGP, CADM1, MDK, EPHA2, PTPRU, RARRES2, SFRP4, DCLK1, STMN1, PSMB8 |
| Osteoblast differentiation                 | 10    | 0.070423   | 6.96E-09       | TMEM119, RRAS2, LRRC17, TNC, EVI2A, TWIST1, RUNX2, GPNMB, EPHA2, IGF2                                                                                                                                                                |
| Multicellular organism development         | 32    | 0.025157   | 3.59E-13       | EYA1, NOTCH3, ANGPTL4, GLIS2, LIF, EPHB2, EGFL7, JAG1, TWIST1, GDF6, FZD8, DKK1, CCBE1, NR1H3, SERPINE2, ZFP36L1, DVL2, TENM4, KIAA1217, EYA2, EFNA5, ZNF521, SERPINF1, KAZALD1, MGP, CADM1, EPHA2, IGF2, HEG1, SFRP4, DCLK1, STMN1  |
| Skeletal system development                | 14    | 0.075676   | 2.21E-12       | SH3PXD2B, FAM20C, NPR3, SOX4, PAPSS2, MMP9, ANKH, EDN1, AEBP1, COMP, RUNX2, TNFRSF11B, EPHA2, IGF2                                                                                                                                   |
| Vasculogenesis                             | 6     | 0.073171   | 1.50E-08       | TEAD2, CAV1, ADM, ZFP36L1, EPHA2, HEG1                                                                                                                                                                                               |
| Extracellular matrix organization          | 14    | 0.050909   | 4.42E-10       | NDNF, RECK, TNC, FGF2, MMP9, SERPINE1, EVI2A, TGFBI, THBS1, COMP, TNFRSF11B, COL14A1, KAZALD1, COL4A1                                                                                                                                |
| Regulation of signalling receptor activity | 17    | 0.037862   | 5.32E-10       | LEP, NBL1, LIF, CXCL8, SERPINE1, STC1, JAG1, GDF6, DKK1, GDF5, ADM, EDN1, PTN, CXCL12, NGF, GPNMB, IGF2                                                                                                                              |
| Cell adhesion                              | 21    | 0.027027   | 1.96E-09       | S1PR1, RGMB, NRP2, TNC, EGFL7, JUP, THBS2, LOXL2, TGFBI, THBS1, CDH6, CXCL12, PERP, THBS3, COMP, COL14A1, CADM1, NRCAM, GPNMB, EPHA2, PTPRU                                                                                          |

**Table S4. Top 10 Terms with the Largest Significant Differences in the GO Biological Process  
Analysis of DE mRNAs Related to the Immune Response**

| Term                                     | Count | Rich Ratio | <i>p</i> Value | Gene                                                                                                                                 |
|------------------------------------------|-------|------------|----------------|--------------------------------------------------------------------------------------------------------------------------------------|
| Immune system process                    | 20    | 0.038685   | 1.24E-13       | ULBP2, CLU, TINAGL1, GSDMD, CD74, SAMHD1, IFITM1, PSMB9, C1S, C1R, ECSIT, HLA-B, CD55, SPON2, CFI, SLC7A8, CFB, PYCARD, CADM1, PSMB8 |
| Positive regulation of apoptotic process | 16    | 0.034858   | 2.02E-10       | CLU, FGD4, FANK1, ARHGEF3, SOX4, MMP9, ANKRD1, EVI2A, ADM, PTN, BNIP3, NGF, PYCARD, PNMA2, LDHA, SFRP4                               |
| Immune response                          | 17    | 0.028428   | 1.18E-09       | ULBP2, TINAGL1, LIF, CXCL8, CD74, SAMHD1, CRIP1, GBP2, SUSP2, C1R, THBS1, HLA-B, 105369230, CXCL12, FCGRT, TNFRSF11B, COLEC12        |
| Inflammatory response                    | 16    | 0.030075   | 1.71E-09       | MAP2K3, GSDMD, GGT5, CXCL8, S1PR3, MGLL, PTX3, CHI3L1, PTGFR, THBS1, TNFRSF11B, PYCARD, SDC1, SELENOP, EPHA2, RARRES2                |
| Response to glucocorticoid               | 8     | 0.096386   | 3.43E-09       | IGFBP2, CCND1, ADM, TYMS, PAPP, SDC1, MDK, PTPRU                                                                                     |
| Response to hypoxia                      | 11    | 0.047619   | 6.75E-09       | LEP, ANGPTL4, EVI2A, CAV1, THBS1, ADM, EDN1, CXCL12, BNIP3, SOD3, LDHA                                                               |
| Innate immune response                   | 17    | 0.025223   | 7.06E-09       | CLU, TINAGL1, GSDMD, SAMHD1, IFITM1, PTX3, C1S, C1R, ECSIT, HLA-B, CD55, SPON2, CFI, CFB, PYCARD, COLEC12, RARRES2                   |
| Cellular response to hypoxia             | 8     | 0.055172   | 2.76E-07       | NDNF, ANKRD1, TWIST1, STC2, EDN1, PTN, ZFP36L1, BNIP3                                                                                |
| Regulation of complement activation      | 7     | 0.067961   | 3.86E-07       | CLU, C1S, C1R, CD55, CFI, CFB, CPNE2                                                                                                 |
| Cellular response to interleukin-1       | 7     | 0.06422    | 5.68E-07       | TFPI, CXCL8, ANKRD1, GBP2, CHI3L1, EDN1, PYCARD                                                                                      |

**Table S5. Characteristics of the circRNAs Involved in the Prediction ceRNA Network**

| circBankID        | circbaseID       | Position                 | Stran SplicedSe |         |                | Gene<br>Symbol |
|-------------------|------------------|--------------------------|-----------------|---------|----------------|----------------|
|                   |                  |                          | d               | qLength | BestTranscript |                |
| hsa_circTHBS2_011 | hsa_circ_0078715 | chr6:169632074-169633112 | -               | 500     | NM_003247      | THBS2          |
| hsa_circTHBS2_016 | hsa_circ_0078711 | chr6:169626274-169629774 | -               | 387     | NM_003247      | THBS2          |
| hsa_circTHBS1_125 | hsa_circ_0034540 | chr15:39885597-39885869  | +               | 272     | NM_003246      | THBS1          |
| hsa_circTHBS1_055 | hsa_circ_0034470 | chr15:39877670-39879721  | +               | 268     | NM_003246      | THBS1          |
| hsa_circTHBS1_081 | hsa_circ_0034496 | chr15:39881159-39882224  | +               | 500     | NM_003246      | THBS1          |
| hsa_circTHBS1_108 | hsa_circ_0034523 | chr15:39883391-39885428  | +               | 742     | NM_003246      | THBS1          |
| hsa_circTHBS1_022 | hsa_circ_0034437 | chr15:39875817-39876388  | +               | 276     | NM_003246      | THBS1          |
| hsa_circTHBS1_086 | hsa_circ_0034501 | chr15:39881159-39886397  | +               | 1720    | NM_003246      | THBS1          |
| hsa_circTHBS1_058 | hsa_circ_0034473 | chr15:39879547-39880419  | +               | 351     | NM_003246      | THBS1          |
| hsa_circTHBS1_023 | hsa_circ_0034438 | chr15:39875817-39876623  | +               | 399     | NM_003246      | THBS1          |
| hsa_circTHBS1_093 | hsa_circ_0034508 | chr15:39881402-39886397  | +               | 1592    | NM_003246      | THBS1          |
| hsa_circTHBS1_075 | hsa_circ_0034490 | chr15:39880800-39882224  | +               | 600     | NM_003246      | THBS1          |
| hsa_circTHBS1_115 | hsa_circ_0034530 | chr15:39883705-39886397  | +               | 952     | NM_003246      | THBS1          |
| hsa_circTHBS1_001 | hsa_circ_0034417 | chr15:39873279-39874125  | +               | 246     | NM_003246      | THBS1          |
| hsa_circTHBS1_033 | hsa_circ_0034448 | chr15:39876188-39876623  | +               | 323     | NM_003246      | THBS1          |
| hsa_circTHBS1_012 | hsa_circ_0034428 | chr15:39874029-39882224  | +               | 2174    | NM_003246      | THBS1          |
| hsa_circTHBS1_096 | hsa_circ_0034511 | chr15:39882005-39883551  | +               | 487     | NM_003246      | THBS1          |
| hsa_circTHBS1_119 | hsa_circ_0034534 | chr15:39884768-39885869  | +               | 735     | NM_003246      | THBS1          |
| hsa_circTHBS1_048 | hsa_circ_0034463 | chr15:39876500-39879721  | +               | 391     | NM_003246      | THBS1          |
| hsa_circTHBS1_107 | hsa_circ_0034522 | chr15:39883391-39885003  | +               | 514     | NM_003246      | THBS1          |
| hsa_circTHBS1_089 | hsa_circ_0034504 | chr15:39881402-39882224  | +               | 372     | NM_003246      | THBS1          |
| hsa_circTHBS1_080 | hsa_circ_0034495 | chr15:39881159-39881555  | +               | 281     | NM_003246      | THBS1          |
| hsa_circTHBS1_034 | hsa_circ_0034449 | chr15:39876188-39877764  | +               | 417     | NM_003246      | THBS1          |
| hsa_circTHBS1_105 | hsa_circ_0034520 | chr15:39882716-39886397  | +               | 1220    | NM_003246      | THBS1          |
| hsa_circTHBS1_008 | hsa_circ_0034424 | chr15:39874029-39874953  | +               | 656     | NM_003246      | THBS1          |
| hsa_circTHBS1_050 | hsa_circ_0034465 | chr15:39876500-39882224  | +               | 1242    | NM_003246      | THBS1          |
| hsa_circTHBS1_109 | hsa_circ_0034524 | chr15:39883391-39885869  | +               | 1014    | NM_003246      | THBS1          |
| hsa_circTHBS1_099 | hsa_circ_0034514 | chr15:39882005-39886397  | +               | 1439    | NM_003246      | THBS1          |
| hsa_circTHBS1_065 | hsa_circ_0034480 | chr15:39880242-39880900  | +               | 351     | NM_003246      | THBS1          |
| hsa_circTHBS1_121 | hsa_circ_0034536 | chr15:39884768-39886641  | +               | 973     | NM_003246      | THBS1          |
| hsa_circTHBS1_117 | hsa_circ_0034532 | chr15:39884768-39885003  | +               | 235     | NM_003246      | THBS1          |
| hsa_circTHBS1_106 | hsa_circ_0034521 | chr15:39883391-39883824  | +               | 279     | NM_003246      | THBS1          |
| hsa_circTHBS1_123 | hsa_circ_0034538 | chr15:39885200-39885869  | +               | 500     | NM_003246      | THBS1          |
| hsa_circTHBS1_110 | hsa_circ_0034525 | chr15:39883391-39886641  | +               | 1252    | NM_003246      | THBS1          |
| hsa_circTHBS1_102 | hsa_circ_0034517 | chr15:39882716-39883824  | +               | 387     | NM_003246      | THBS1          |
| hsa_circTHBS1_118 | hsa_circ_0034533 | chr15:39884768-39885428  | +               | 463     | NM_003246      | THBS1          |
| hsa_circTHBS1_113 | hsa_circ_0034528 | chr15:39883705-39885003  | +               | 354     | NM_003246      | THBS1          |
| hsa_circTHBS1_120 | hsa_circ_0034535 | chr15:39884768-39886397  | +               | 833     | NM_003246      | THBS1          |
| hsa_circTHBS1_030 | hsa_circ_0034445 | chr15:39875817-39886397  | +               | 2738    | NM_003246      | THBS1          |

|                      |                  |                          |   |     |              |          |
|----------------------|------------------|--------------------------|---|-----|--------------|----------|
| hsa_circTHBS1_101    | hsa_circ_0034516 | chr15:39882716-39883551  | + | 268 | NM_003246    | THBS1    |
| hsa_circTHBS1_126    | hsa_circ_0034541 | chr15:39885597-39886397  | + | 370 | NM_003246    | THBS1    |
| hsa_circTGFB1_015    | hsa_circ_0074046 | chr5:135389631-135396625 | + | 780 | NM_000358    | TGFB1    |
| hsa_circTGFB1_009    | hsa_circ_0128030 | chr5:135382539-135385269 | + | 454 | NM_000358    | TGFB1    |
| hsa_circSERPINE2_006 | hsa_circ_0058476 | chr2:224849468-224856717 | - | 397 | NM_006216    | SERPINE2 |
| hsa_circSERPINE2_004 | hsa_circ_0005773 | chr2:224856519-224863059 | - | 426 | NM_006216    | SERPINE2 |
| hsa_circSERPINE1_013 | hsa_circ_0081574 | chr7:100778774-100780365 | + | 272 | NM_000602    | SERPINE1 |
| hsa_circSERPINE1_010 | hsa_circ_0081571 | chr7:100776975-100780365 | + | 471 | NM_000602    | SERPINE1 |
| hsa_circSERPINE1_007 | hsa_circ_0081568 | chr7:100773701-100775350 | + | 429 | NM_000602    | SERPINE1 |
| hsa_circSERPINE1_001 | hsa_circ_0081562 | chr7:100770378-100771945 | + | 419 | NM_000602    | SERPINE1 |
| hsa_circMT2A_002     | hsa_circ_0039460 | chr16:56642903-56643409  | + | 301 | NM_005953    | MT2A     |
| hsa_circLOXL2_002    | hsa_circ_0083670 | chr8:23198504-23217778   | - | 388 | NM_002318    | LOXL2    |
| hsa_circLOXL2_007    | hsa_circ_0083666 | chr8:23167180-23174627   | - | 410 | NM_002318    | LOXL2    |
| hsa_circLOX_001      | hsa_circ_0073686 | chr5:121406188-121411236 | - | 391 | NM_002317    | LOX      |
| hsa_circLDHA_006     | hsa_circ_0006469 | chr11:18422383-18425358  | + | 466 | NM_001165414 | LDHA     |
| hsa_circLDHA_005     | hsa_circ_0021450 | chr11:18422383-18424560  | + | 348 | NM_001165414 | LDHA     |
| hsa_circLDHA_009     | hsa_circ_0021453 | chr11:18424386-18425358  | + | 292 | NM_001165414 | LDHA     |
| hsa_circLDHA_004     | hsa_circ_0021449 | chr11:18418365-18421095  | + | 268 | NM_001165414 | LDHA     |
| hsa_circCD74_002     | hsa_circ_0074531 | chr5:149784242-149786887 | - | 500 | NM_001025159 | CD74     |
| hsa_circCCND1_002    | hsa_circ_0023304 | chr11:69457798-69458759  | + | 376 | NM_053056    | CCND1    |

**Table S6. Primers Used for qPCR in the Validation**

| Gene        | Forward Primer (5'-3')           | Reverse Primer (5'-3')          |
|-------------|----------------------------------|---------------------------------|
| GAPDH       | GGATGCAGGGATGATGTTCC             | TGCACCACCAACTGCTTAG             |
| U6          | CTCGCTTCGGCAGCACAA               | AACGCTTCACGAATTTGCGT            |
| miR-1908-5p | CGGCGGGGACGGCGATTGGTC            | CAGTGCCTGTCGTGGAGT              |
| miR-16-5p   | GGGTAGCAGCACGTAAATA              | CAGTGCCTGTCGTGGAGT              |
| miR-122-5p  | GGGTGGAGTGTGACAATGG              | CAGTGCCTGTCGTGGAGT              |
| miR-193a-3p | GGGAACTGGCCTACAAAGT              | CAGTGCCTGTCGTGGAGT              |
| miR-199b-5p | CCAGTGTTTAGACTATCTGTTC           | CAGTGCCTGTCGTGGAGT              |
| miR-339-5p  | TCCCTGTCCTCCAGGAGCT              | CAGTGCCTGTCGTGGAGT              |
| miR-210-5p  | GGGAGCCCCCTGCCACCCG              | CAGTGCCTGTCGTGGAGT              |
| miR-431-5p  | GGGUGUCUUGCAGGCCGU               | CAGTGCCTGTCGTGGAGT              |
| miR-17-5p   | GGGCAAAGUGCUUACAGUGC             | CAGTGCCTGTCGTGGAGT              |
| miR-451a    | AAACCGTTACCATTACTGAGTT           | CAGTGCCTGTCGTGGAGT              |
| COMP        | GGCCCTGCATAGGGAATTAGA            | TGTCCTCTGACATCCAACCTC           |
| STC1        | CACGAGCTGACTTCAACAGGA            | GGATGTGCGTTTGTATGTGGG           |
| ADAMTS1     | TGCGACGCTGCTTCTATTCTG            | CCTCGGTAGCCAAAGGCTC             |
| INKA2       | AAAGAATTCTCCATTATGACGATGGAGAGCAG | AAACTCGAGTCAGACCCAAACAGCTGTGTTA |
| CDH6        | AGAACTTACCGCTACTTCTTGC           | TGCCACATACTGATAATCGGA           |
| SPON2       | GGAGAGTCCATCTGTTCCGC             | ATGCTGTAGTCGGAGCTATGC           |
| STC2        | GCGTGCAGGTTCAAGTGTGA             | GGCCAGTCTCCCTACTGCT             |
| SERPINE2    | GGAAGGAACCATGAACTGGC             | GGGGAGAGATCACGATGTTGT           |
| LIF         | CCAACGTGACGGACTTCCC              | TACACGACTATGCGGTACAGC           |
| PTN         | GGAGCTGAGTGCAAGCAAAC             | CTCGCTTCAGACTTCCAGTTC           |
| RUNX2       | CCGCCTCAGTGATTTAGGGC             | GGGTCTGTAATCTGACTCTGTCC         |
| GREM1       | CGGAGCGCAAATACCTGAAG             | GGTTGATGATGGTGCAGCTGT           |
| DKK1        | CCTTGAACCTCGGTTCTCAATTCC         | CAATGGTCTGGTACTTATTCCCG         |
| SERPINF1    | GGAAATTCCCAGATGAGATCAGC          | AGTCAAACCTTTGTTACCCACTGC        |
| ANGPTL4     | GGCTCAGTGGACTTCAACCG             | CCGTGATGCTATGCACCTTCT           |
| PLTP        | AAGAGCGGATGGTGTATGTGG            | ATGGGGAGTCAATCACTGCTG           |
| MMP9        | TGTACCGCTATGGTTACTCTCG           | GGCAGGGACAGTTGCTTCT             |
| CCND1       | GCTGCGAAGTGGAACCATC              | CCTCCTTCTGCACACATTTGAA          |
| SERPINE1    | AGTGGACTTTTCAGAGGTGGA            | GCCGTTGAAGTAGAGGGCATT           |
| NDUFA4L2    | CCTGAGCCCCAATGACCAATA            | TCTGGCCGGTCTTCTTCA              |
| TINAGL1     | ATGGGACCCACTCAGTCAAGA            | GTTGGCCGCAGTCCAGTATTT           |
| COLEC12     | AATCCTTCGGTTACAAGCGGT            | ACTGTGATTGTTAGCAAGGCAC          |
| APOE        | GTTGCTGGTCACATTCCTGG             | GCAGGTAATCCCAAAAGCGAC           |
| MDK         | CGCGGTTCGCCAAAAGAAAG             | TACTTGCAGTCGGCTCCAAAC           |
| AEBP1       | ACCCACACTGGACTACAATGA            | GTTGGGGATCACGTAACCATC           |
| MIR99AHG    | AGATTGCCTGCCACACACAT             | AAGTTTTCTGCATCCGTGCG            |
| LINC01503   | CTTTCCCTGAGGACCATCTG             | CAAAATCCGGTCTTTCTGGA            |
| ITGA6-AS1   | AGGTGGCAACATCCCTACAC             | GACCCAACAGGCATGAAGGTA           |
| INKA2-AS1   | ACATTCAGCCTGGACACCC              | TGAAGGTCCTTTTCAGCTCCC           |
| STXBP5-AS1  | GAGATTTAGGTGGGGACGCTGC           | AGGGACTTGCCTTGTCTGCTGAT         |



---

|              |                        |                         |
|--------------|------------------------|-------------------------|
| LOC102723409 | CAGGAGCCCAGCAAGTGTCT   | TGATAGGGAGCAAGCAGTTCG   |
| LOC105747689 | AATATGGGGCACCAACGGAG   | GCAAGCTCCTCCACTGAACA    |
| LINC02407    | GATGAAAACGACATGCGTGACA | TTCACTGTCGGTCTCCCTCT    |
| LOC105377378 | TTGGATGGATGACTATTTCTGC | AGGGGAAGTGGTACAAAAGCA   |
| BCYRN1       | ATAGCTTGAGCCCAGGAGTT   | GCTTTGAGGGAAGTTACGCTTAT |
| LINC00968    | AGATGATGTCGCAAGGGTGG   | GGCTCCACCTGAAGTTACCC    |
| LINC01423    | CAAGGTCCTGCTGTCTTTCCA  | GATGGTAACACCCCATCTGCT   |
| LINC01013    | CATCCAGCAGTGCCCAAGTA   | GCTCTCCTTTGTTCCAGGCT    |
| circ_0078715 | GGGAAGCAGGGGTTGGATAA   | CTCATCTGCGGGGAGGACT     |
| circ_0078711 | TCATCACAGGCATCGCCAATC  | GACGGTGTGGGGGATCACT     |
| circ_0058476 | ACCCTTGAAATACACTGCGT   | CAGCACCAAGACCATAGACA    |
| circ_0005773 | TACCAACTCCACACCGGAAC   | AAGAAACGCACTTTCGTGGC    |
| circ_0081571 | GTCATAGTCTCAGCCCGCAT   | GTGAACTCAGCTGTGGGGTT    |
| circ_0081562 | GCAACGTGGTTTTCTCACCC   | ACAGCTGTGCTCCTCATCAA    |
| circ_0041340 | CAGCATTCTCCTTCTCGGTGT  | TACCATGGATGTCTGGGCTG    |

---

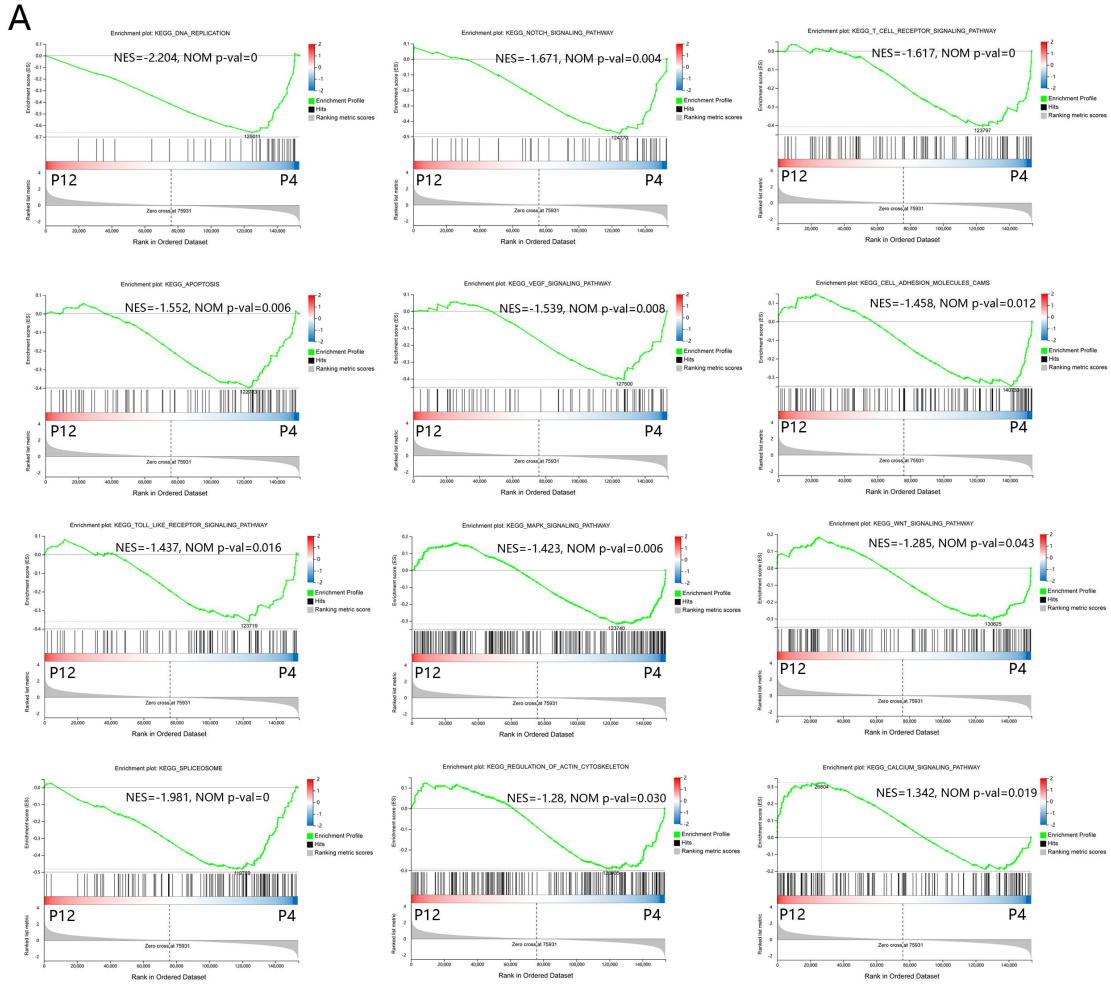

**Figure S1. Results of KEGG from GSEA.**

A.12 representative enriched senescence-related KEGG pathways from genes of P4 and P12. Normalized enrichment score (NES) and nominal p-value (NOM p-val) are shown.

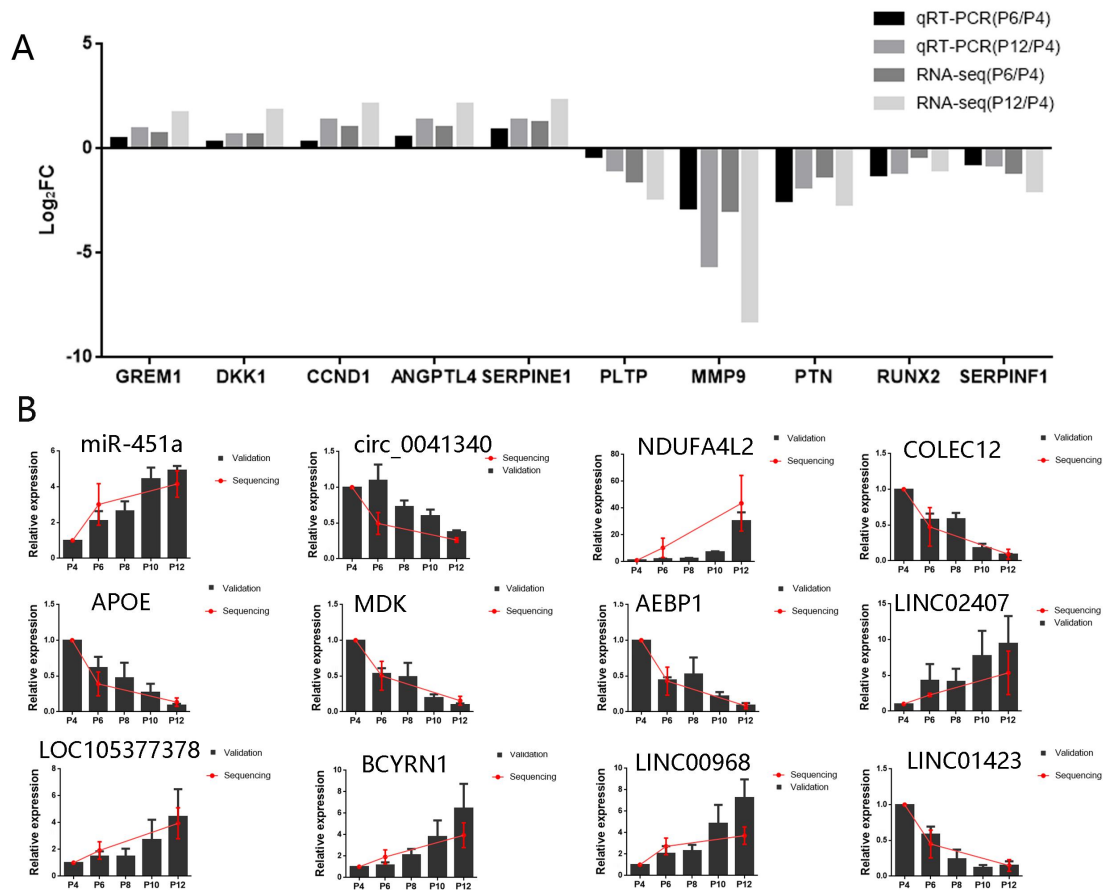

**Figure S2. qPCR Validation**

A. Comparison of  $\log_2FC$  of mRNAs involved in important process and pathway between RNA-Seq and qRT-PCR. B. qPCR validation of the expression levels of some RNAs in MSCs at P4, P6, P8, P10 and P12 merging the RNA sequencing (RNA-seq) results in P4, P6 and P12. Data are presented as the means  $\pm$  SEM.  $n=3$  MSCs per passage in RNA-Seq.  $n=10$  per passage in qRT-PCR.
